# Supplementary material for: Potential Oral Anticancer Therapeutic Agents of Hexahydrocurcumin-Encapsulated Chitosan Nanoparticles against MDA-MB-231 Breast Cancer Cells
Source: MDPI journal article supplement (doi:10.3390/pharmaceutics15020472), 2023-01-31
Supplement: s1 [file s1]

**Table S1** Summary result of regression analysis for model fitting.

**Notes:**  $X_1$  = TPP (mg/mL),  $X_2$  = Pluronic® F-127 (% w/v),  $X_3$  = HHC (mg/mL),  $Y_1$  = particle size (nm),  $Y_2$  = zeta potential (mV), and  $Y_3$  = EE (%).

**Equation:**

The equation below explained the physical meaning and significance necessary for the second-order polynomial model used in response surface analysis, given as equations S1-S3.

$$Y = \beta_0 + \beta_1X_1 + \beta_2X_2 + \beta_3X_3 + \beta_{12}X_1X_2 + \beta_{13}X_1X_3 + \beta_{23}X_2X_3 + \beta_{11}X_1^2 + \beta_{22}X_2^2 + \beta_{33}X_3^2$$

Where  $Y$  is response (dependent variable),  $\beta_0$  is intercept,  $\beta_1 - \beta_{33}$  are regression coefficients computed from the observed value of  $Y$  from experiments, and  $X_1$ ,  $X_2$  and  $X_3$  are factors (independent variables). The terms ( $X_1X_2$ ,  $X_1X_3$ , and  $X_2X_3$ ) and ( $X_1^2$ ,  $X_2^2$ , and  $X_3^2$ ) represent the interaction and quadratic terms, respectively [1]. The mathematic model equation was used to evaluate the effect of each factor on the responses and determine the optimum setting of these variables to achieve optimum response [2]. “

**Equation:**

**Equation S1** The multiple linear regression for the response particle size ( $Y_1$ )

$$\text{Particle size } (Y_1) = + 239.87 + 84.87X_1 + 56.12X_2 + 17.00X_3$$

**Equation S2** The multiple linear regression for the response zeta potential ( $Y_1$ )

$$\text{Zeta potential } (Y_2) = + 31.07 - 9.00X_1 - 1.63X_2 - 0.625X_3$$

**Equation S3** The multiple linear regression for the response EE ( $Y_3$ )

$$\begin{aligned} \text{EE } (Y_3) = & + 75.00 + 10.62X_1 - 3.25X_2 + 14.63X_3 + 2.51X_1X_2 - 1.75X_1X_3 + 1.50X_2X_3 - 1.12X_1^2 - 0.875X_2^2 \\ & - 5.13X_3^2 \end{aligned}$$

Where  $Y$  is response,  $X_1$  = TPP (mg/mL),  $X_2$  = Pluronic® F-127 (% w/v),  $X_3$  = HHC (mg/mL),  $Y_1$  = particle size (nm),  $Y_2$  = zeta potential (mV), and  $Y_3$  = EE (%).

## References

1. Motwani, S.K.; Chopra, S.; Kohli, T.K.; Ahmad, F.J.; Khar, R.K. Chitosan-sodium alginate nanoparticles as submicroscopic reservoirs for ocular delivery: formulation, optimisation and *in vitro* characterisation. *Eur. J. Pharm. Biopharm*, **2008**, *68* (2008), 513–525. doi: 10.1016/j.ejpb.2007.09.009. Epub 2007 Sep 25.
2. Khuri, A.I.; Mukhopadhyay, S. Response surface methodology. *WIREs Comp Stat*, **2010**, *2*, 128-149. doi.org/10.1002/wics.73.
